# Supplementary material for: CD8+ T Cell-Induced Expression of Tissue Inhibitor of Metalloproteinses-1 Exacerbated Osteoarthritis
Source: MDPI journal article supplement (doi:10.3390/ijms141019951), 2013-10-08

## Supplementary Information

**Table S1.** The percentage of CD4<sup>+</sup>/TIMP-1<sup>+</sup> and CD8<sup>+</sup>/TIMP-1<sup>+</sup> cells in spleens after osteoarthritis (OA) induction.

| Cells  | CD4 <sup>+</sup> /TIMP-1 <sup>+</sup> |                     | CD8 <sup>+</sup> /TIMP-1 <sup>+</sup> |                                  |
|--------|---------------------------------------|---------------------|---------------------------------------|----------------------------------|
| Group  | Sham                                  | ACLT                | Sham                                  | ACLT                             |
| Day 30 | 24.93 (21.45–28.41)                   | 22.65 (20.98–24.32) | 12.57 (11.27–13.87)                   | 15.07 (13.54–16.60) <sup>a</sup> |
| Day 90 | 16.82 (13.11–20.53)                   | 15.14 (11.05–19.23) | 8.30 (5.82–10.78)                     | 21.82 (16.06–27.58) <sup>b</sup> |

Sham, the mice were not subjected to anterior cruciate ligament-transection (ACLT); ACLT, the mice were subjected to ACLT to induce OA; Data are means ± 95% confidence intervals and analyzed using Student's *t*-test; Significance was set at *p* < 0.05; <sup>a</sup> *p* < 0.01 compared to the Sham group; <sup>b</sup> *p* < 0.001 compared to the Sham group.

**Figure S1.** Spleens from the Sham and ACLT groups on day 30, 60 and 90 were removed. Serial sections were stained with antibodies against CD8<sup>+</sup> and TIMP-1. The section showed from upper and lower panels were from the same section. Only the Sham group on day 90 was shown. In the ACLT group mice, increased TIMP-1-expressing CD8<sup>+</sup> T cells were seen in spleens compared to those in the Sham group 90 days post-surgery (200× magnification; scale bar = 50 μm). The CD8- and TIMP-1-double positive cells were indicated with white insets. The TIMP-1 single positive cells were indicated with red insets. The highest number of double-positive cells was found in the spleens of mice 90 days after surgery. The number decreased progressively in those of mice on day 60, and day 30 at sacrifice.

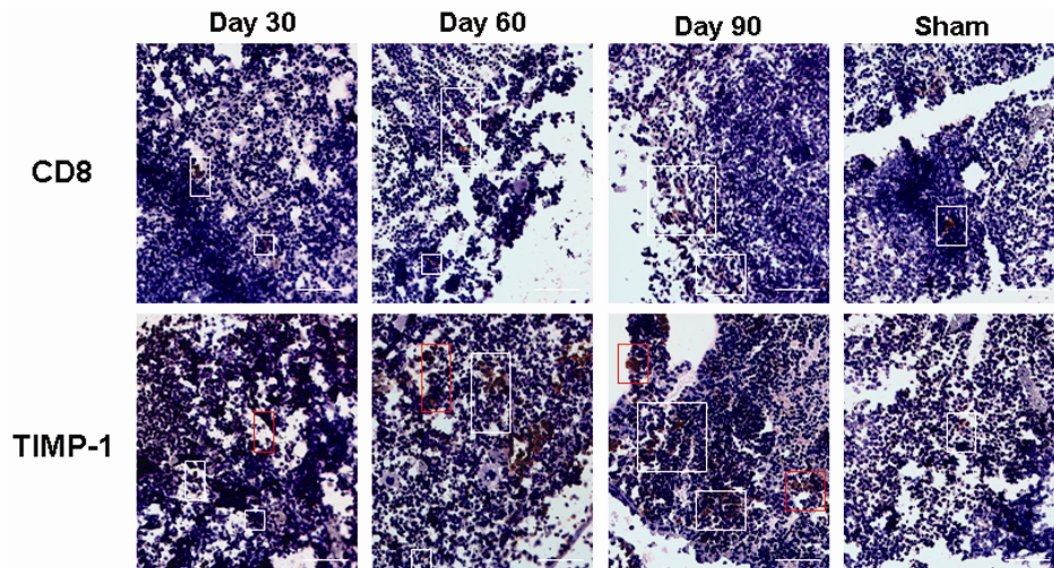

Supplement: s1 [file s1]
